# Supplementary material for: A Novel Gene List Identifies Tumors with a Stromal-Mesenchymal Phenotype and Worse Prognosis in Gastric Cancer
Source: MDPI journal article supplement (doi:10.3390/cancers15113035), 2023-06-02
Supplement: s1 [file s1]

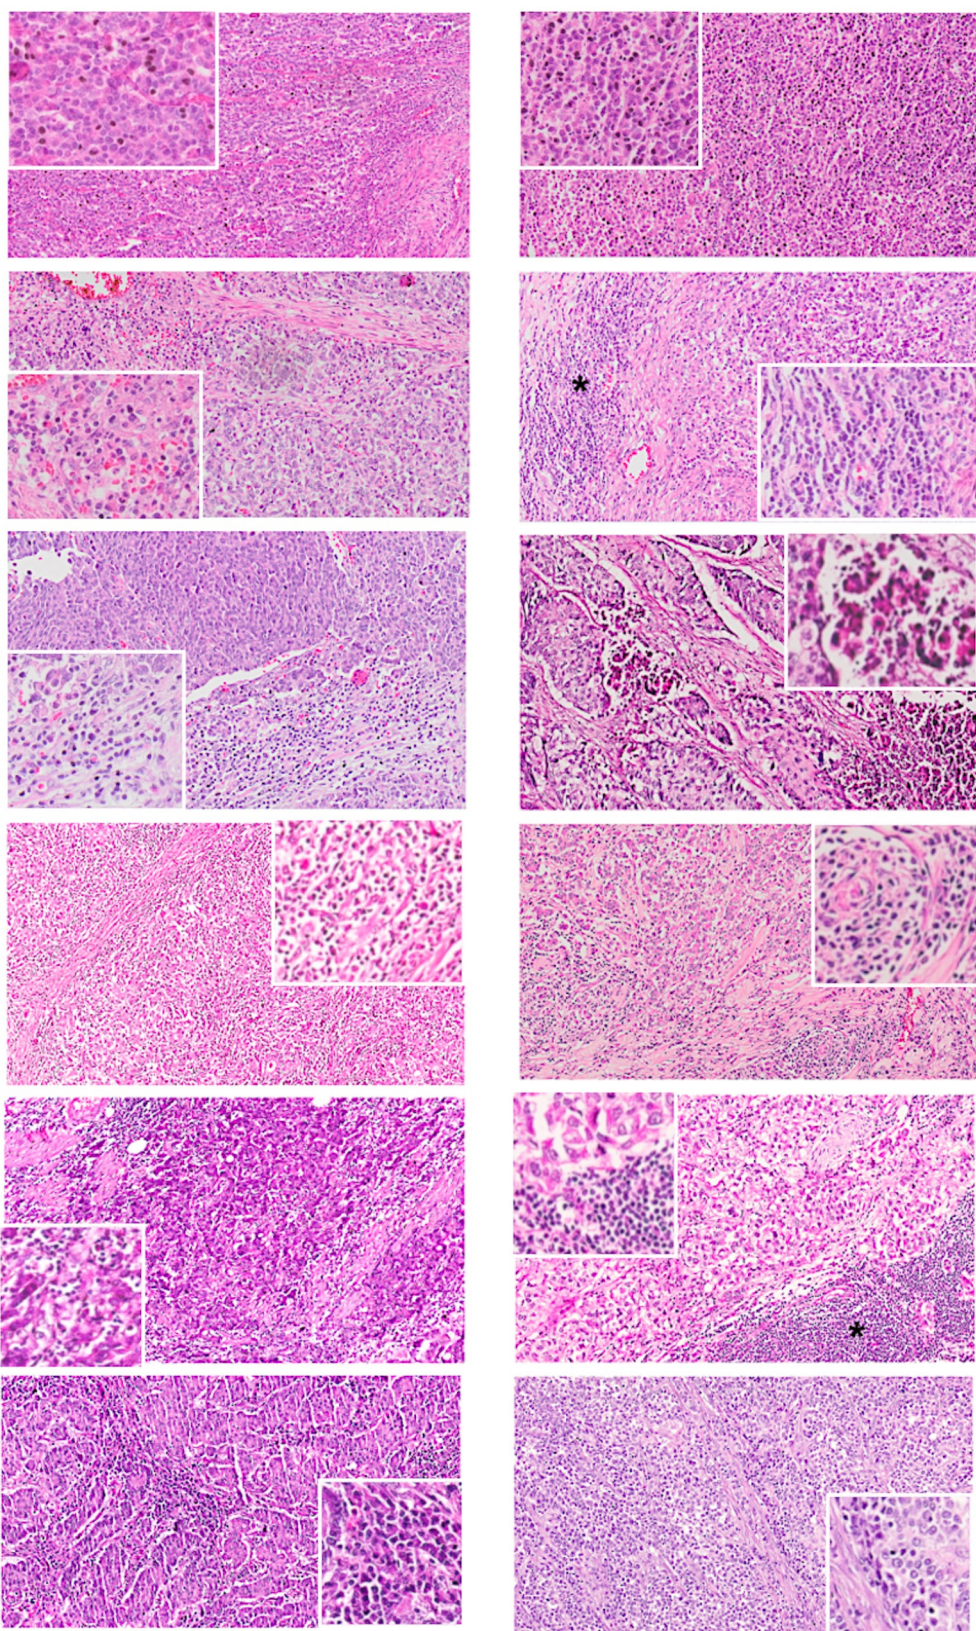

**Supplementary Figure S17:** Hematoxylin and eosin (H&E) stained sections from 12 gastric carcinoma cases with lymphoid stroma. All 12 tumors show medullary pattern with sheets and/or trabeculae of syncytial polygonal neoplastic cells embedded within a lymphocyte rich stroma (representative lymphoid rich regions are indicated with asterisks). Neoplasms lack prominent glandular differentiation and frequently contain intraepithelial lymphocytes.
