# Supplementary material for: A Novel Gene List Identifies Tumors with a Stromal-Mesenchymal Phenotype and Worse Prognosis in Gastric Cancer
Source: MDPI journal article supplement (doi:10.3390/cancers15113035), 2023-06-02
Supplement: s1 [file s1]

# A Novel Gene List Identifies Tumors with a Stromal-Mesenchymal Phenotype and Worse Prognosis in Gastric Cancer

Secil Demirkol Canli, Meral Uner, Baris Kucukkaraduman, Diren Arda Karaoglu, Aynur Isik, Nesrin Turhan, Aytekin Akyol, Ismail Gomceli and Ali Osmay Gure

**Table S1.** Patient Characteristics of Turkish cohort (n = 40) \*.

| Age                     | Nr.** | Percentage |
|-------------------------|-------|------------|
| above 60                | 26    | 65.0 %     |
| below 60                | 14    | 35.0 %     |
| Gender                  |       |            |
| Male                    | 26    | 65.0 %     |
| Female                  | 14    | 35.0 %     |
| TNM Stage               |       |            |
| 1B                      | 3     | 7.5 %      |
| 2A                      | 11    | 27.5 %     |
| 2B                      | 12    | 30.0 %     |
| 3A                      | 3     | 7.5 %      |
| 3B                      | 4     | 10.0 %     |
| 4                       | 4     | 10.0 %     |
| NA                      | 3     | 7.5 %      |
| Differentiation         |       |            |
| low                     | 20    | 50.0 %     |
| moderate                | 10    | 25.0 %     |
| high                    | 5     | 12.5 %     |
| NA                      | 5     | 12.5 %     |
| Perineural invasion     |       |            |
| yes                     | 25    | 62.5 %     |
| no                      | 14    | 35.0 %     |
| NA                      | 1     | 2.5 %      |
| Lymphovascular invasion |       |            |
| yes                     | 32    | 80.0 %     |
| no                      | 7     | 17.5 %     |
| NA                      | 1     | 2.5 %      |
| MMR status              |       |            |
| pMMR                    | 25    | 62.5%      |
| eqMMR                   | 7     | 17.5 %     |
| dMMR                    | 7     | 17.5 %     |
| NA                      | 1     | 2.5 %      |

\* Two patients who did not have paraffin blocks are not included.

\*\* Number of patients

**Table S2.** Primers used in qRT-PCR experiments.

|                |                             |
|----------------|-----------------------------|
| <b>ACTA2 F</b> | <b>ACTGCCTTGGTGTGTGACAA</b> |
| ACTA2 R        | CACCATCACCCCCTGATGTC        |
| CALD1 F        | TCGACCCATCAAGCAGCAA         |
| CALD1 R        | TTTGCGCTTTTGTTCCTCAA        |
| HEYL F         | CATCGACGTGGGCCAAGAG         |
| HEYL R         | GCCGTTTCTCTATGATCCCTCTG     |
| TAGLN F        | CTATGGCATGAGCCGCGAAG        |
| TAGLN R        | ACCAGCTTGCTCAGAATCACG       |
| TPM2 F         | GAAGCCGACAAGAAGCAAGC        |
| TPM2 R         | ATCTGCCTCAGCATCAGTGG        |
| CDH1 F         | TCCAGGAACCTCTGTGATGGA       |
| CDH1 R         | CGTAGGGAAACTCTCTCGGTC       |
| VIM F          | CGGGAGAAATTGCAGGAGGA        |
| VIM R          | AAGGTCAAGACGTGCCAGAG        |
| B2M F          | TAAGCAGCATCATGGAGTTTG       |
| B2M R          | AGCAAGCAAGCAGAATTTGGA       |
| GAPDH F        | TCGGAGTCAACGGATTTGGT        |
| GAPDH R        | TTCCCGTTCTCAGCCTTGAC        |

**Table S3.** Antibodies used in immunohistochemistry.

| <b>Antibody</b>        | <b>Antigen/ Epitope Retrieval Reagent</b> | <b>Dilution</b> | <b>Clone</b> | <b>Trademark /Vendor</b> |
|------------------------|-------------------------------------------|-----------------|--------------|--------------------------|
| HEYL                   | EDTA                                      | 1:250           | HPA076960*   | SIGMA ALDRICH            |
| CALD1                  | Citrate                                   | 1:2000          | HPA017330*   | SIGMA ALDRICH            |
| TAGLN                  | Citrate                                   | 1:100           | HPA019467*   | SIGMA ALDRICH            |
| ACTA2 ( $\alpha$ -SMA) | Citrate                                   | 1:1000          | 1a4 (asm-1)  | NEOMARKERS               |
| TMP2                   | EDTA                                      | 1:25            | HPA053624*   | SIGMA ALDRICH            |
| MLH1                   | EDTA                                      | 1:50            | ES05         | Novocastra               |
| MSH2                   | EDTA                                      | 1:100           | 79H11        | Novocastra               |
| MSH6                   | EDTA                                      | 1:100           | PU29         | Novocastra               |
| PMS2                   | EDTA                                      | 1:100           | M0R4G        | Novocastra               |

\*Antibody is selected based on the staining patterns and matching transcripts information <https://www.proteinatlas.org>.

**Table S4.** Cox regression analysis in GSE15459 and GSE62254.

| Probeset    | Gene      | GSE15459 |          |              | GSE62254 |          |              | RANK SUM<br>coxp |
|-------------|-----------|----------|----------|--------------|----------|----------|--------------|------------------|
|             |           | HR       | Cox p    | RANK<br>coxp | HR       | Cox p    | RANK<br>coxp |                  |
| 226828_s_at | HEYL      | 1.702609 | 8.58E-06 | 52           | 1.697446 | 3.1E-10  | 25           | 77               |
| 201162_at   | IGFBP7    | 1.741568 | 0.000119 | 198          | 1.892259 | 4.47E-08 | 207          | 405              |
| 229669_at   | LOC339260 | 1.449439 | 6.35E-06 | 46           | 1.346171 | 2.06E-07 | 362          | 408              |
| 201125_s_at | ITGB5     | 3.080442 | 3.11E-07 | 10           | 2.37884  | 4.02E-07 | 453          | 463              |
| 206091_at   | MATN3     | 1.387757 | 1.85E-05 | 71           | 1.420368 | 2.82E-07 | 397          | 468              |
| 228608_at   | NALCN     | 1.732879 | 9.04E-08 | 4            | 1.544278 | 6.89E-07 | 515          | 519              |
| 212509_s_at | MXRA7     | 1.381559 | 0.001038 | 607          | 1.691716 | 1.23E-10 | 13           | 620              |
| 210517_s_at | AKAP12    | 1.303829 | 0.000299 | 312          | 1.330301 | 1.41E-07 | 321          | 633              |
| 228121_at   | TGFB2     | 1.443572 | 0.000199 | 252          | 1.489531 | 2.52E-07 | 388          | 640              |
| 227145_at   | LOXL4     | 1.665041 | 0.000787 | 522          | 1.823658 | 1.06E-08 | 121          | 643              |
| 205547_s_at | TAGLN     | 1.277949 | 0.000935 | 567          | 1.331379 | 4.83E-09 | 80           | 647              |
| 201310_s_at | NREP      | 1.482584 | 0.000613 | 454          | 1.589381 | 5.12E-08 | 224          | 678              |
| 204083_s_at | TPM2      | 1.220071 | 0.001071 | 623          | 1.378113 | 5.19E-09 | 86           | 709              |
| 209191_at   | TUBB6     | 1.335698 | 0.001102 | 634          | 1.619157 | 5.19E-09 | 87           | 721              |
| 200771_at   | LAMC1     | 1.439938 | 0.001314 | 705          | 2.121746 | 5.05E-10 | 30           | 735              |
| 200974_at   | ACTA2     | 1.36725  | 0.001223 | 676          | 1.52945  | 4.38E-09 | 76           | 752              |
| 212077_at   | CALD1     | 1.462355 | 0.000262 | 289          | 1.644855 | 4.76E-07 | 470          | 759              |
| 202052_s_at | RAI14     | 1.67207  | 2.01E-05 | 75           | 1.651876 | 1.68E-06 | 694          | 769              |
| 225946_at   | RASSF8    | 1.24281  | 0.001026 | 602          | 1.426558 | 3.34E-08 | 185          | 787              |
| 228080_at   | LAYN      | 1.295407 | 0.001005 | 592          | 1.418032 | 4.32E-08 | 202          | 794              |

**Table S5.** Multivariate cox regression analysis – OS (GSE26901).

|        |                              | Number | p value      | HR    | 95.0% CI for Exp(B) |       |
|--------|------------------------------|--------|--------------|-------|---------------------|-------|
|        |                              |        |              |       | Lower               | Upper |
| Step 1 | <b>SU-SD</b>                 |        | <b>0.01</b>  | 0.444 | 0.24                | 0.82  |
|        | SU (ref)                     | 18     |              |       |                     |       |
|        | SD                           | 90     |              |       |                     |       |
|        | <b>Adjuvant chemotherapy</b> |        | 0.228        | 0.718 | 0.418               | 1.231 |
|        | Yes (ref)                    | 39     |              |       |                     |       |
|        | No                           | 69     |              |       |                     |       |
| Step 2 | <b>SU-SD</b>                 |        | <b>0.006</b> | 0.423 | 0.23                | 0.776 |

**Table S6.** Gene set enrichment analysis comparing SU-SD prognostic groups.

| <b>GSE62254*</b>                                  |                  |            |
|---------------------------------------------------|------------------|------------|
| <b>NAME</b>                                       | <b>FDR q-val</b> | <b>NES</b> |
| EXTRACELLULAR_REGION                              | 0                | -0.6       |
| ACTIN_CYTOSKELETON_ORGANIZATION_AND_BIOGENESIS    | 0.004            | -0.51      |
| ACTIN_BINDING                                     | 0.012            | -0.53      |
| CYTOSKELETON                                      | 0                | -0.39      |
| EXTRACELLULAR_REGION_PART                         | 0                | -0.63      |
| ACTIN_CYTOSKELETON                                | 0.006            | -0.5       |
| PROTEINACEOUS_EXTRACELLULAR_MATRIX                | 0                | -0.78      |
| EXTRACELLULAR_MATRIX                              | 0                | -0.77      |
| EXTRACELLULAR_MATRIX_PART                         | 0                | -0.8       |
| WOUND_HEALING                                     | 0.017            | -0.6       |
| CELL_MIGRATION                                    | 0                | -0.63      |
|                                                   |                  |            |
| NEGATIVE_REGULATION_OF_METABOLIC_PROCESS          | 0                | -0.39      |
| CELL_CYCLE_ARREST_GO_0007050                      | 0.004            | -0.55      |
| NEGATIVE_REGULATION_OF_CELL_CYCLE                 | 0.002            | -0.49      |
|                                                   |                  |            |
| <b>GSE15459*</b>                                  |                  |            |
| <b>NAME</b>                                       | <b>FDR q-val</b> | <b>NES</b> |
| ACTIN_FILAMENT_BASED_PROCESS                      | 0.03             | -0.42      |
| CYTOSKELETON_ORGANIZATION_AND_BIOGENESIS          | 0.006            | -0.4       |
| ACTIN_CYTOSKELETON_ORGANIZATION_AND_BIOGENESIS    | 0.034            | -0.44      |
| ACTIN_BINDING                                     | 0.05             | -0.47      |
| EXTRACELLULAR_MATRIX                              | 0.016            | -0.69      |
| PROTEINACEOUS_EXTRACELLULAR_MATRIX                | 0.018            | -0.7       |
| CYTOSKELETAL_PROTEIN_BINDING                      | 0.004            | -0.47      |
| EXTRACELLULAR_MATRIX_PART                         | 0.01             | -0.72      |
| WOUND_HEALING                                     | 0.04             | -0.53      |
|                                                   |                  |            |
| NEGATIVE_REGULATION_OF_TRANSCRIPTION              | 0.002            | -0.43      |
| NEGATIVE_REGULATION_OF_CELL_CYCLE                 | 0.01             | -0.46      |
| NEGATIVE_REGULATION_OF_CELLULAR_METABOLIC_PROCESS | 0.014            | -0.38      |
| NEGATIVE_REGULATION_OF_METABOLIC_PROCESS          | 0.018            | -0.38      |
| CELL_CYCLE_ARREST_GO_0007050                      | 0.004            | -0.54      |

\* Enriched gene sets with a consistent pattern of biology were listed in GSE62254 and GSE15459 datasets. FDR q values below 0.25 were considered significant.

**Table S7.** Distribution of the SU and SD samples among EMT related sub-groups.

| <b>GSE62254*</b> |           |           | <b>GSE15459*</b> |           |
|------------------|-----------|-----------|------------------|-----------|
|                  | <b>SU</b> | <b>SD</b> | <b>SU</b>        | <b>SD</b> |
| <b>E</b>         | 12        | 92        | <b>E</b>         | 0         |
| <b>I</b>         | 86        | 74        | <b>I</b>         | 35        |
| <b>M</b>         | 34        | 2         | <b>M</b>         | 5         |

\* Chi square  $p < 0.00001$  for both datasets.

**Table S8.** Distribution of SU-SD groups and TCGA subtypes.

|              | TCGA subtype              |                           |                           |                           | TOTAL         |
|--------------|---------------------------|---------------------------|---------------------------|---------------------------|---------------|
|              | STAD_CIN                  | STAD_EBV                  | STAD_GS                   | STAD_MSI                  |               |
| <b>SU</b>    | 63<br>(30.4%)<br>(58.3%)* | 5<br>(18.5%)<br>(4.6%)*   | 27<br>(60.0%)<br>(25.0%)* | 13<br>(21.3%)<br>(12.0%)* | 108<br>(100%) |
| <b>SI</b>    | 90<br>(43.5%)<br>(68.7%)* | 9<br>(33.3%)<br>(6.9%)*   | 14<br>(31.1%)<br>(10.7%)* | 18<br>(29.5%)<br>(13.7%)* | 131<br>(100%) |
| <b>SD</b>    | 54<br>(26.1%)<br>(53.4%)* | 13<br>(48.1%)<br>(12.9%)* | 4<br>(8.9%)<br>(4.0%)*    | 30<br>(49.2%)<br>(29.7%)* | 101<br>(100%) |
| <b>TOTAL</b> | 207 (100%)                | 27 (100%)                 | 45 (100%)                 | 61 (100%)                 |               |

Number of samples, percentage among TCGA subtypes, and percentage among SU-SI-SD groups (\*) are shown.

Chi square  $p < 0.001$

**Table S9.** Multivariate analysis of prognostic subgroups and TCGA subtypes -OS.

|                          | No. of patients | Percentage | HR    | 95% CI Lower | 95% CI Upper | p-value      |
|--------------------------|-----------------|------------|-------|--------------|--------------|--------------|
| <b>Prognostic groups</b> |                 |            |       |              |              |              |
| SD (ref.)                | 90              | 30.50%     |       |              |              | <b>0.027</b> |
| SI vs SD                 | 115             | 38.98%     | 1.368 | 0.852        | 2.196        | 0.195        |
| SU vs SD                 | 90              | 30.50%     | 1.965 | 1.194        | 3.236        | <b>0.008</b> |
| <b>TCGA subtypes</b>     |                 |            |       |              |              |              |
| MSI (ref.)               | 48              | 16.60%     |       |              |              | 0.579        |
| CIN vs MSI               | 177             | 73.40%     | 1.332 | 0.79         | 2.246        | 0.282        |
| EBV vs MSI               | 26              | 32.30%     | 1.242 | 0.555        | 2.777        | 0.598        |
| GS vs MSI                | 38              | 29.70%     | 0.987 | 0.485        | 2.01         | 0.971        |

**Table S10.** Univariate and multivariate cox regression analysis – OS (GSE62254).

| GSE62254                     |                 |            | Univariate |              |              |                  | Multivariate |              |              |                  |
|------------------------------|-----------------|------------|------------|--------------|--------------|------------------|--------------|--------------|--------------|------------------|
|                              | No. of patients | Percentage | HR         | 95% CI Lower | 95% CI Upper | p-value          | HR           | 95% CI Lower | 95% CI Upper | p-value          |
| <b>Gender</b>                |                 |            |            |              |              |                  |              |              |              |                  |
| Female                       | 101             | 33.67%     | 1.105      | .790         | 1.545        | .559             |              |              |              |                  |
| Male                         | 199             | 66.33%     |            |              |              |                  |              |              |              |                  |
| <b>Age</b>                   |                 |            |            |              |              |                  |              |              |              |                  |
| >60                          | 183             | 61.00%     | .792       | .568         | 1.104        | .168             |              |              |              |                  |
| <60                          | 117             | 39.00%     |            |              |              |                  |              |              |              |                  |
| <b>Tumor subtype</b>         |                 |            |            |              |              |                  |              |              |              |                  |
| intestinal (ref.)            | 150             | 50.00%     |            |              |              | <b>.004</b>      |              |              |              | <b>.034</b>      |
| diffuse vs intestinal        | 142             | 47.33%     | 1.746      | 1.258        | 2.424        | <b>.001</b>      | .802         | .429         | 1.501        | .491             |
| mixed vs intestinal          | 8               | 2.67%      | 1.689      | .679         | 4.205        | .260             | 6.642        | 1.436        | 30.723       | <b>.015</b>      |
| <b>Location</b>              |                 |            |            |              |              |                  |              |              |              |                  |
| antrum (ref.)                | 155             | 51.67%     |            |              |              | <b>.013</b>      |              |              |              | .757             |
| body                         | 107             | 35.67%     | 1.091      | .765         | 1.555        | .631             | 1.253        | .630         | 2.492        | .520             |
| cardia                       | 32              | 10.67%     | 1.661      | 1.021        | 2.702        | <b>.041</b>      | 1.334        | .462         | 3.852        | .594             |
| whole                        | 6               | 2.00%      | 3.273      | 1.416        | 7.566        | <b>.006</b>      | .659         | .161         | 2.706        | .563             |
| <b>H.pylori infection</b>    |                 |            |            |              |              |                  |              |              |              |                  |
| no                           | 72              | 24.00%     | 1.161      | .686         | 1.966        | .579             | 1.622        | .892         | 2.947        | .113             |
| yes                          | 55              | 18.33%     |            |              |              |                  |              |              |              |                  |
| notchecked*                  | 173             | 57.67%     |            |              |              |                  |              |              |              |                  |
| <b>AJCC stage</b>            |                 |            |            |              |              |                  |              |              |              |                  |
| 1                            | 31              | 10.33%     | 2.283      | 1.875        | 2.780        | <b>&lt;0.001</b> | 3.025        | 1.973        | 4.638        | <b>&lt;0.001</b> |
| 2                            | 164             | 54.67%     |            |              |              |                  |              |              |              |                  |
| 3                            | 76              | 25.33%     |            |              |              |                  |              |              |              |                  |
| 4                            | 27              | 9.00%      |            |              |              |                  |              |              |              |                  |
| <b>MLH1 IHC</b>              |                 |            |            |              |              |                  |              |              |              |                  |
| Negative                     | 64              | 21.33%     |            |              |              | <b>0.027</b>     |              |              |              | .122             |
| positive                     | 233             | 77.67%     |            |              |              |                  | 7.879        | .826         | 75.178       | .073             |
| partial loss*                | 2               | 0.67%      |            |              |              |                  | 2.109        | .779         | 5.708        | .142             |
| positive; MSH2 mutation (+)* | 1               | 0.33%      |            |              |              |                  |              |              |              |                  |
| <b>Mol. Subtype</b>          |                 |            |            |              |              |                  |              |              |              |                  |
| EMT (ref.)                   | 46              | 15.33%     |            |              |              | <b>.000</b>      |              |              |              | .341             |
| MSI                          | 68              | 22.67%     | .332       | .195         | .566         | <b>.000</b>      | 2.586        | .789         | 8.475        | .117             |
| MSS/TP53-                    | 107             | 35.67%     | .640       | .417         | .982         | <b>.041</b>      | .979         | .420         | 2.279        | .960             |
| MSS/TP53+                    | 79              | 26.33%     | .502       | .315         | .801         | <b>.004</b>      | 1.117        | .440         | 2.832        | .816             |
| <b>EBV ISH</b>               |                 |            |            |              |              |                  |              |              |              |                  |
| positive                     | 18              | 6.00%      |            |              |              | .619             |              |              |              |                  |
| negative                     | 257             | 85.67%     |            |              |              |                  |              |              |              |                  |
| NA*                          | 25              | 8.33%      |            |              |              |                  |              |              |              |                  |
| <b>SU-SD Sub-groups</b>      |                 |            |            |              |              |                  |              |              |              |                  |
| SD                           | 168             | 56%        | 2.486      | 1.798        | 3.438        | <b>&lt;0.001</b> | 2.115        | 1.102        | 4.060        | <b>.024</b>      |
| SU                           | 132             | 44%        |            |              |              |                  |              |              |              |                  |

\* Not included in the analysis.

**Table S11.** Univariate and multivariate cox regression analysis – OS (GSE84437).

| GSE84437          |                 |            | Univariate |              |              |         | Multivariate |              |              |         |
|-------------------|-----------------|------------|------------|--------------|--------------|---------|--------------|--------------|--------------|---------|
|                   | No. of patients | Percentage | HR         | 95% CI Lower | 95% CI Upper | p-value | HR           | 95% CI Lower | 95% CI Upper | p-value |
| <b>Gender</b>     |                 |            |            |              |              |         |              |              |              |         |
| Female            | 137             | 31.79%     | 0.808      | 0.597        | 1.094        | 0.168   |              |              |              |         |
| Male (ref)        | 294             | 68.21%     |            |              |              |         |              |              |              |         |
| <b>Age</b>        |                 |            |            |              |              |         |              |              |              |         |
| >60               | 237             | 54.99%     | 1.324      | 1.148        | 1.527        | <0.001  | 1.848        | 1.388        | 2.46         | <0.001  |
| <60 (ref)         | 194             | 45.01%     |            |              |              |         |              |              |              |         |
| <b>pT stage</b>   |                 |            |            |              |              |         |              |              |              |         |
| T1, T2 (ref)      | 49              | 11.37%     | 3.708      | 1.901        | 7.235        | <0.001  | 3.054        | 1.553        | 6.003        | 0.001   |
| T3, T4            | 382             | 88.63%     |            |              |              |         |              |              |              |         |
| <b>pN stage</b>   |                 |            |            |              |              |         |              |              |              |         |
| N1, N2 (ref)      | 399             | 92.58%     | 2.317      | 1.37         | 3.334        | 0.001   | 2.035        | 1.298        | 3.191        | 0.002   |
| N3, N4            | 32              | 7.42%      |            |              |              |         |              |              |              |         |
| <b>SU-SD</b>      |                 |            |            |              |              |         |              |              |              |         |
| <b>Sub-groups</b> |                 |            |            |              |              |         |              |              |              |         |
| SD                | 220             | 51.04%     | 1.809      | 1.37         | 2.388        | 0.001   | 1.794        | 1.352        | 2.382        | <0.001  |
| SU                | 211             | 48.96%     |            |              |              |         |              |              |              |         |

**Table S12.** Univariate Cox regression analysis of clinical parameters in discovery and validation cohorts – OS.

|                                | DISCOVERY        |         | VALIDATION       |         |
|--------------------------------|------------------|---------|------------------|---------|
|                                | GSE15459 (n=192) |         | GSE29272 (n=126) |         |
|                                | HR               | p-value | HR               | p-value |
| <b>Stage*</b>                  | 2.789            | <0.001  | 1.155            | 0.451   |
| <b>Age (&lt; or &gt; 60)</b>   | 0.983            | 0.936   | 1.407            | 0.098   |
| <b>Gender (Female or male)</b> | 0.713            | 0.127   | 1.122            | 0.642   |
| <b>Tumor subtype**</b>         |                  | 0.578   |                  | 0.134   |

\* Stage: treated as a continuous variable (1, 2, 3, 4).

\*\* Tumor subtype: treated as a categorical variable (intestinal, mixed, diffuse)

**Table S13.** Multivariate cox regression analysis of prognostic classification and stage in GSE15459-OS.

| GSE15459        | p-value | HR    | 95% CI for HR |       |
|-----------------|---------|-------|---------------|-------|
|                 |         |       | Lower         | Upper |
| <b>SD vs SU</b> | 0.002   | 0.493 | 0.316         | 0.770 |
| <b>Stage*</b>   | <0.001  | 2.608 | 1.997         | 3.406 |

\* Stage: treated as a continuous variable (1, 2, 3, 4).

**Table S14.** Gene-gene linear correlations of IHC based expression (H-score).

|                       | Expression in | Stroma | Stroma | Stroma | Neoplasti<br>c | Stroma | Neoplasti<br>c | Stroma | Inflammator<br>y cells |
|-----------------------|---------------|--------|--------|--------|----------------|--------|----------------|--------|------------------------|
| Expression in         |               | ACTA2  | TAGLN  | CALD1  | TPM2           | TPM2   | HEYL           | HEYL   | HEYL                   |
| Stroma                | <b>ACTA2</b>  |        | 0.38*  | 0.54*  | 0.12           | 0.29   | 0.03           | 0.1    | -0.22                  |
| Stroma                | <b>TAGLN</b>  |        |        | 0.3    | 0.1            | 0.12   | 0.08           | 0.1    | 0.02                   |
| Stroma                | <b>CALD1</b>  |        |        |        | -0.06          | 0.27   | -0.2           | 0.1    | -0.01                  |
| Tumor                 | <b>TPM2</b>   |        |        |        |                | 0.43*  | 0.52*          | 0.44*  | 0.39*                  |
| Stroma                | <b>TPM2</b>   |        |        |        |                |        | 0.48*          | 0.62*  | 0.38*                  |
| Tumor                 | <b>HEYL</b>   |        |        |        |                |        |                | 0.41*  | 0.55*                  |
| Stroma                | <b>HEYL</b>   |        |        |        |                |        |                |        | 0.48*                  |
| Inflammatory<br>cells | <b>HEYL</b>   |        |        |        |                |        |                |        |                        |

Spearman rho values are shown (n = 40).

\* p &lt; 0.05

**Table S15.** Correlation of qRT-PCR based expression levels.

|              | ACTA2 | CALD1 | HEYL | TAGLN | TPM2 | CDH1  | VIM   | IHC STROMA<br>PERCENTAGE |
|--------------|-------|-------|------|-------|------|-------|-------|--------------------------|
| <b>ACTA2</b> |       | 0.89  | 0.57 | 0.95  | 0.84 | -0.43 | 0.76  | 0.38                     |
| <b>CALD1</b> |       |       | 0.62 | 0.9   | 0.87 | -0.48 | 0.81  | 0.47                     |
| <b>HEYL</b>  |       |       |      | 0.5   | 0.57 | -0.3* | 0.64  | 0.3*                     |
| <b>TAGLN</b> |       |       |      |       | 0.82 | -0.43 | 0.77  | 0.41                     |
| <b>TPM2</b>  |       |       |      |       |      | -0.45 | 0.7   | 0.4                      |
| <b>CDH1</b>  |       |       |      |       |      |       | -0.41 | -0.16*                   |
| <b>VIM</b>   |       |       |      |       |      |       |       | 0.42                     |

Spearman rho values are shown for correlations between gene expression (n = 42) and correlations between gene expression and stromal percentage (n = 40).

\* all relationships except these are significant (p &lt; 0.05)
