# Supplementary material for: A Novel Gene List Identifies Tumors with a Stromal-Mesenchymal Phenotype and Worse Prognosis in Gastric Cancer
Source: MDPI journal article supplement (doi:10.3390/cancers15113035), 2023-06-02
Supplement: s1 [file s1]

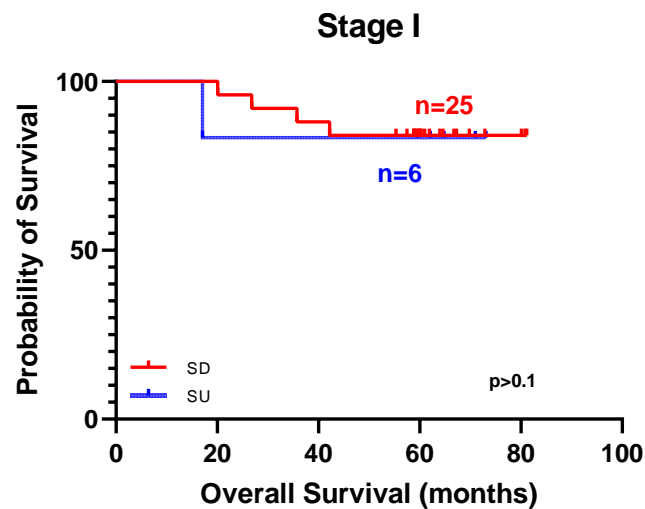

No. at risk:

|     |    |    |    |    |   |
|-----|----|----|----|----|---|
| SD: | 25 | 25 | 23 | 14 | 4 |
| SU: | 6  | 6  | 6  | 5  | 1 |

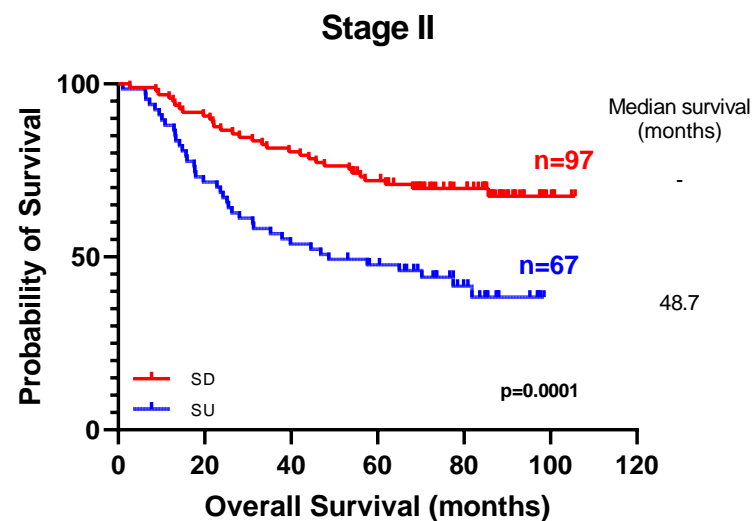

No. at risk:

|     |    |    |    |    |    |   |
|-----|----|----|----|----|----|---|
| SD: | 97 | 89 | 79 | 68 | 42 | 7 |
| SU: | 67 | 49 | 37 | 31 | 15 | 1 |

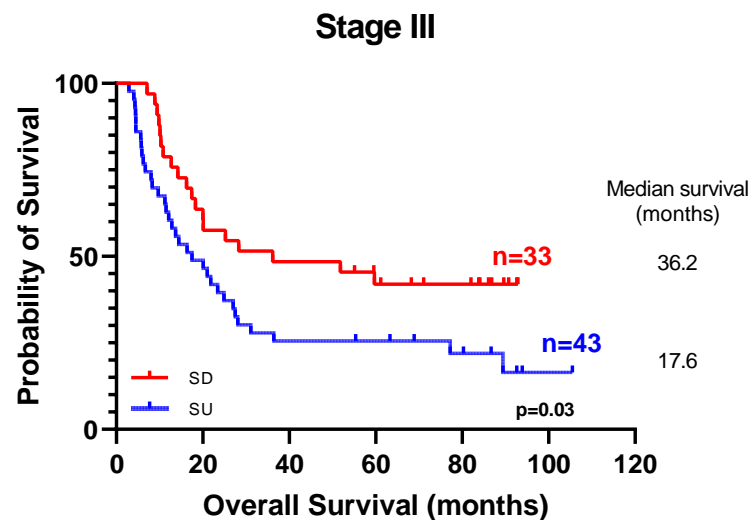

No. at risk:

|     |    |    |    |    |    |   |
|-----|----|----|----|----|----|---|
| SD: | 33 | 22 | 17 | 13 | 10 | 1 |
| SU: | 43 | 22 | 12 | 11 | 7  | 2 |

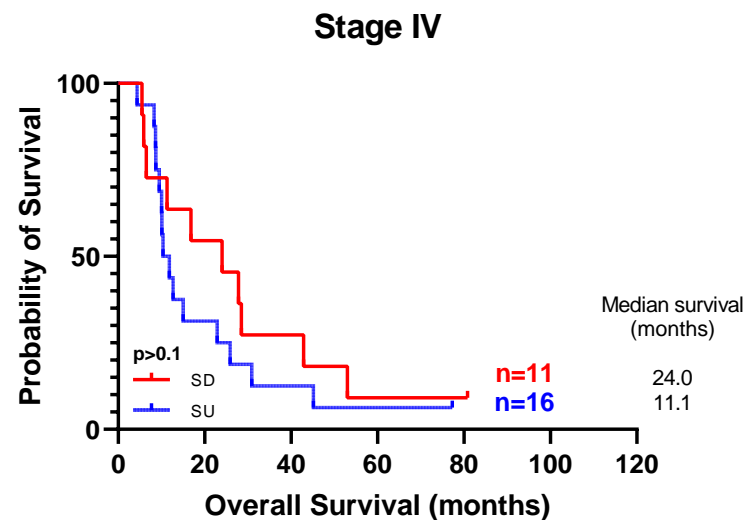

No. at risk:

|     |    |   |   |   |   |
|-----|----|---|---|---|---|
| SD: | 11 | 7 | 4 | 2 | 2 |
| SU: | 16 | 6 | 3 | 2 | 1 |

**Supplementary Figure S16:** Kaplan Meier graphs comparing SU-SD groups stratified by stage (GSE62254). Prognostic difference between SU and SD groups were evaluated within each stage. Overall survival was used as clinical outcome. Log-rank p values are indicated.
