# Supplementary material for: A Novel Gene List Identifies Tumors with a Stromal-Mesenchymal Phenotype and Worse Prognosis in Gastric Cancer
Source: MDPI journal article supplement (doi:10.3390/cancers15113035), 2023-06-02
Supplement: s1 [file s1]

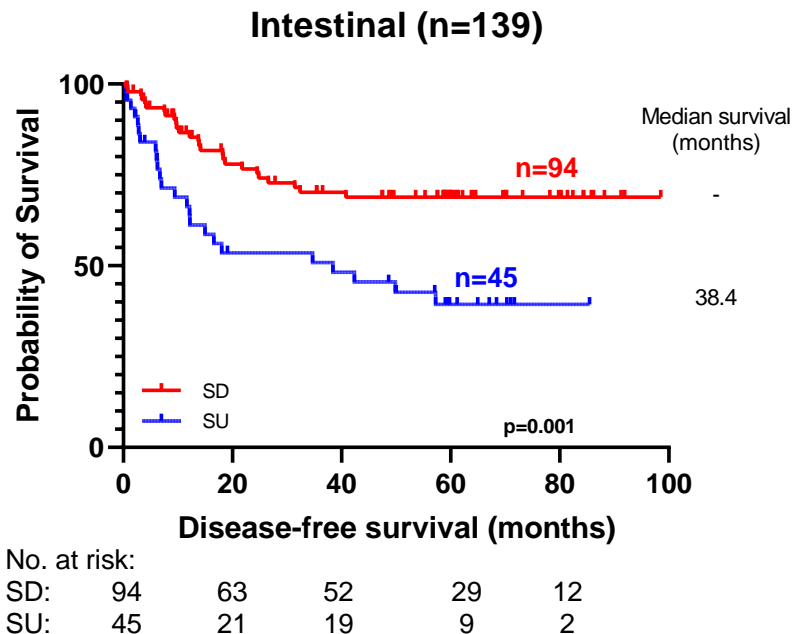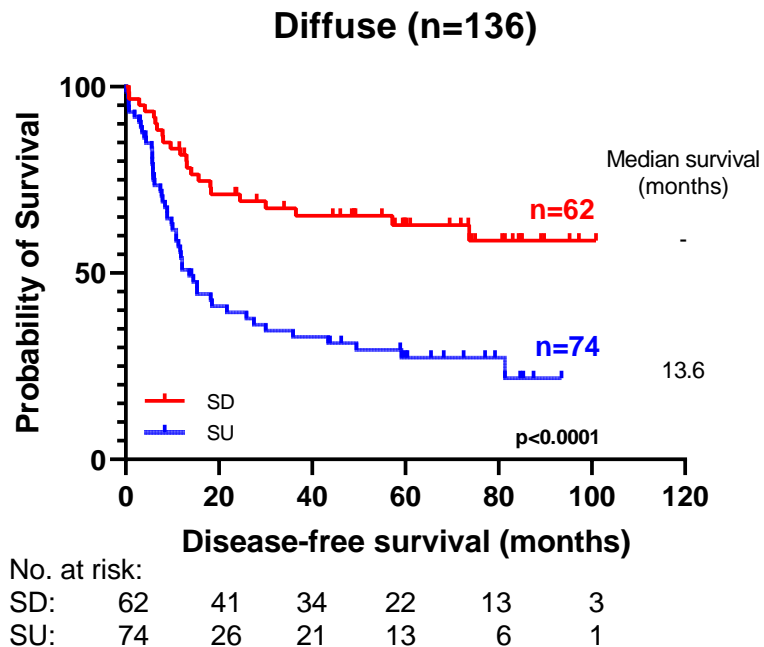

**Supplementary Figure S14:** Prognostic analysis of SU-SD groups for intestinal and diffuse type diseases, using disease-free survival as clinical outcome (GSE62254). Prognostic difference between SU and SD groups were evaluated. Log-rank p values are indicated.
