# Supplementary material for: A Novel Gene List Identifies Tumors with a Stromal-Mesenchymal Phenotype and Worse Prognosis in Gastric Cancer
Source: MDPI journal article supplement (doi:10.3390/cancers15113035), 2023-06-02
Supplement: s1 [file s1]

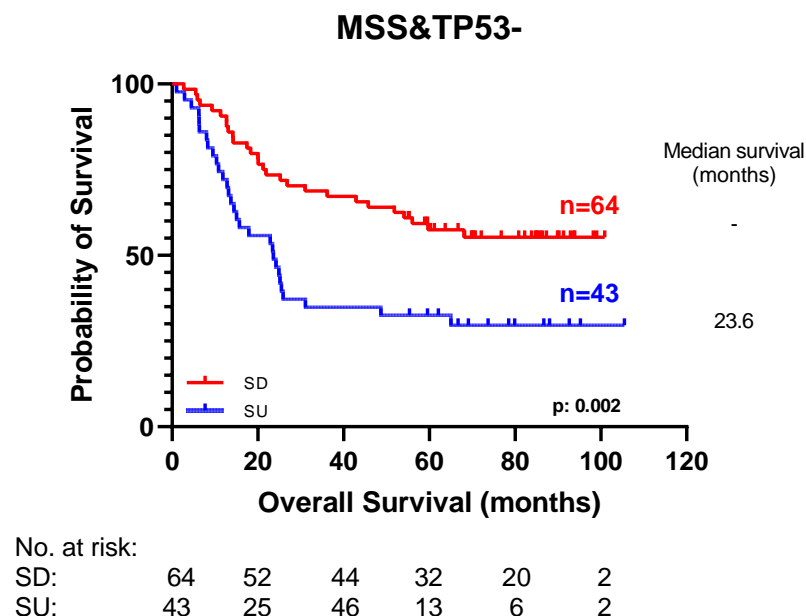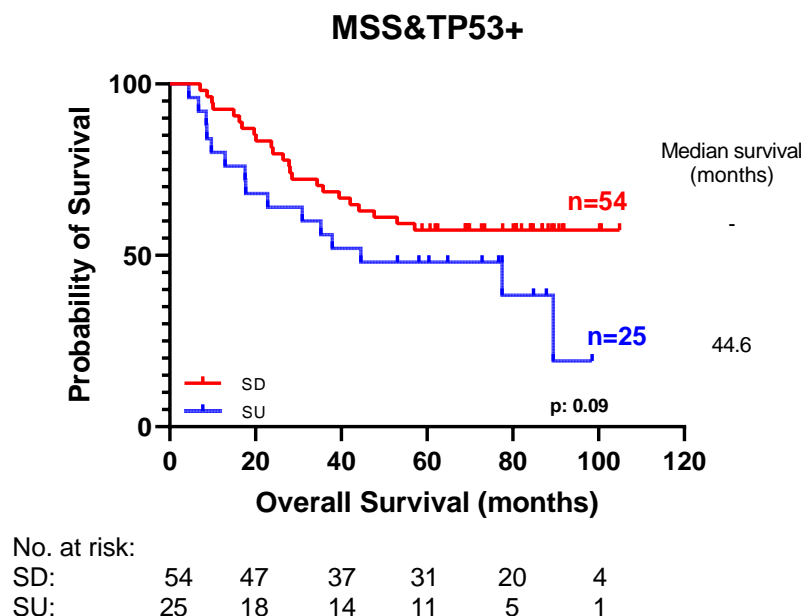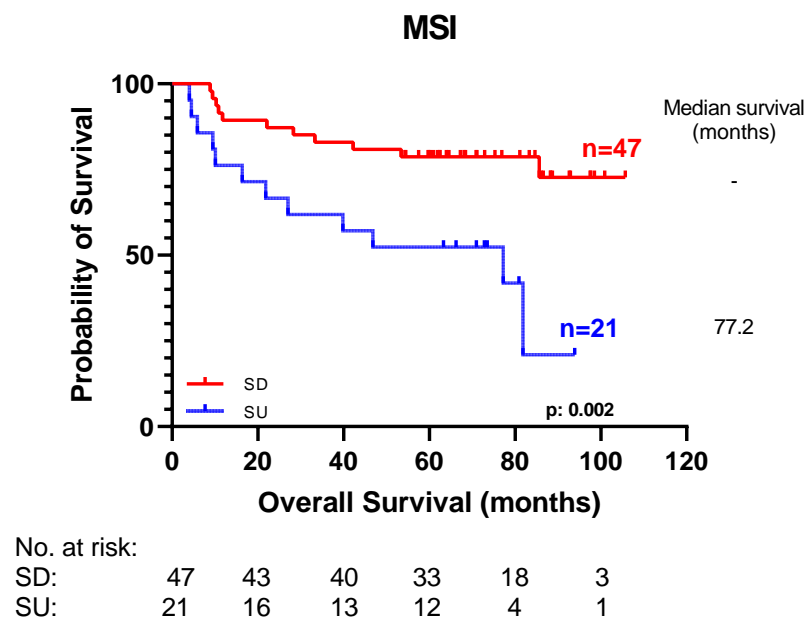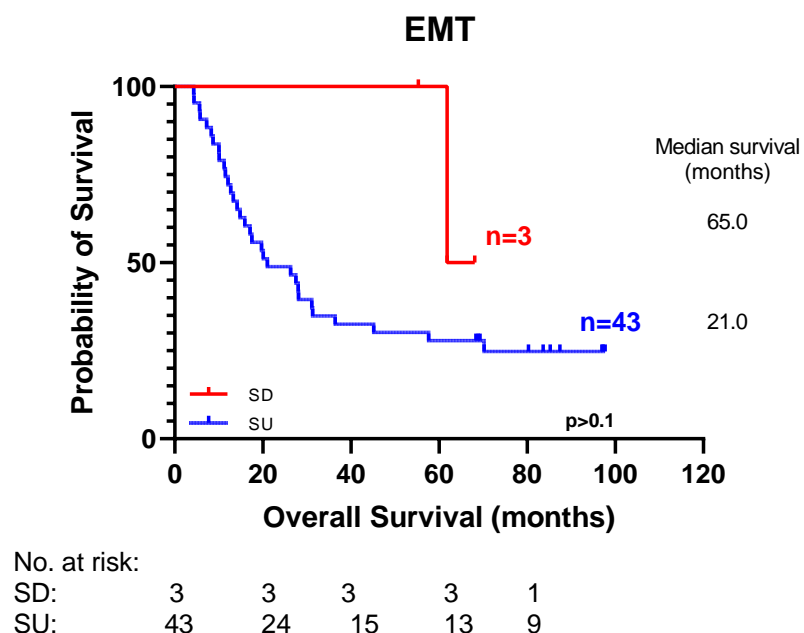

**Supplementary Figure S15:** Kaplan Meier graphs comparing SU-SD groups stratified by ACRG subtypes. Tumor samples in GSE62254 were separated into four distinct gastric tumor sub-groups previously defined by the Asian Cancer Research Group (ACRG); MSI, MSS/EMT, MSS/TP53+ (MSS with intact TP53 activity), MSS/TP53- (MSS with TP53 functional loss). Prognostic difference between SU and SD groups was evaluated within each group. Overall survival was used as clinical outcome. Log-rank p values are indicated.
