# Supplementary material for: A Novel Gene List Identifies Tumors with a Stromal-Mesenchymal Phenotype and Worse Prognosis in Gastric Cancer
Source: MDPI journal article supplement (doi:10.3390/cancers15113035), 2023-06-02
Supplement: s1 [file s1]

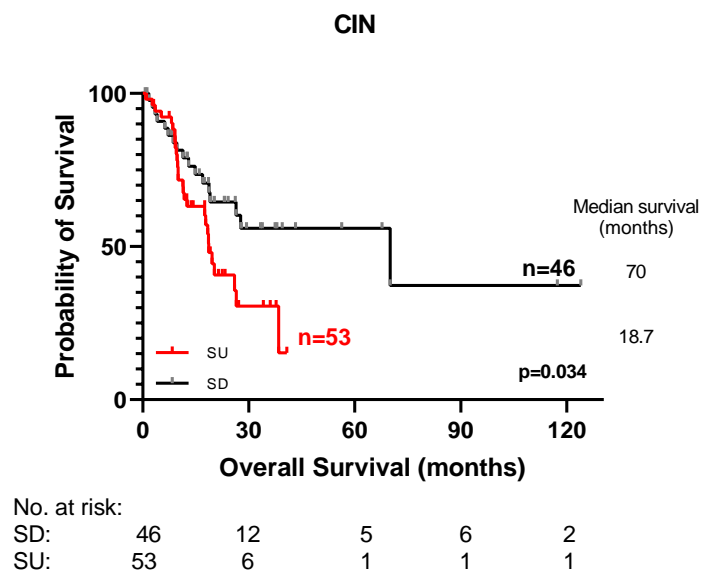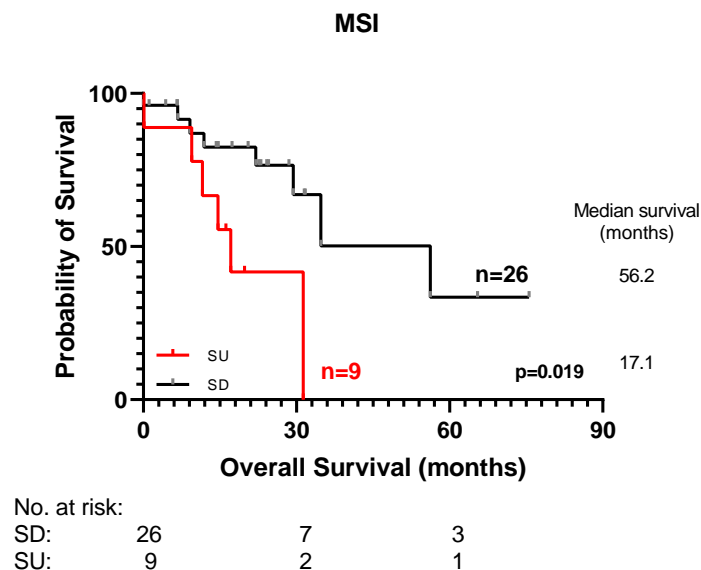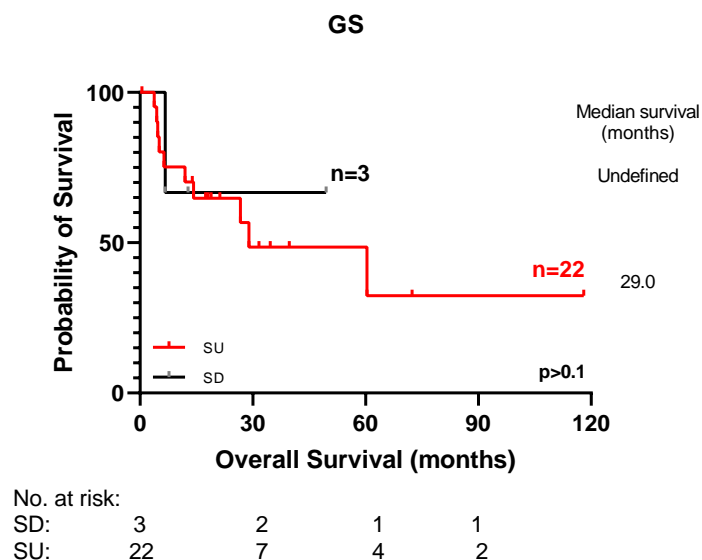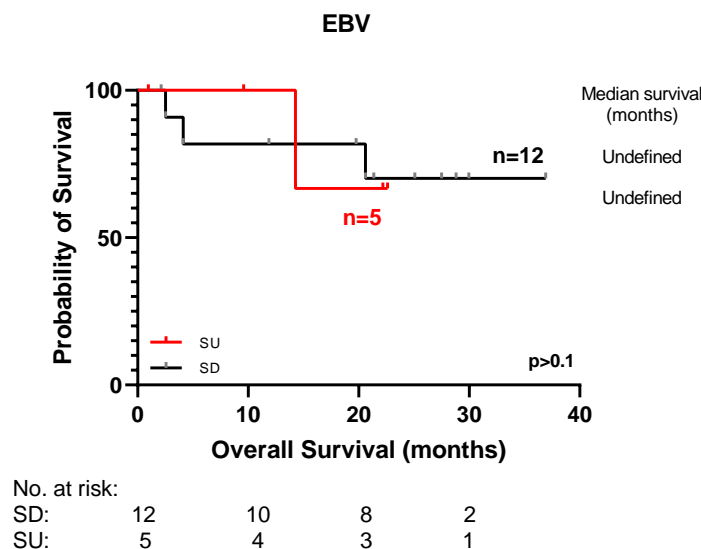

**Supplementary Figure S13:** Kaplan Meier graphs comparing SU-SD groups stratified by TCGA subtypes. Overall survival was used as clinical outcome. Log-rank p values are indicated. EBV: Tumors positive for Epstein–Barr virus, MSI: microsatellite instable tumors, GS: genomically stable tumors, CIN: tumors with chromosomal instability.
