# Supplementary material for: A Novel Gene List Identifies Tumors with a Stromal-Mesenchymal Phenotype and Worse Prognosis in Gastric Cancer
Source: MDPI journal article supplement (doi:10.3390/cancers15113035), 2023-06-02
Supplement: s1 [file s1]

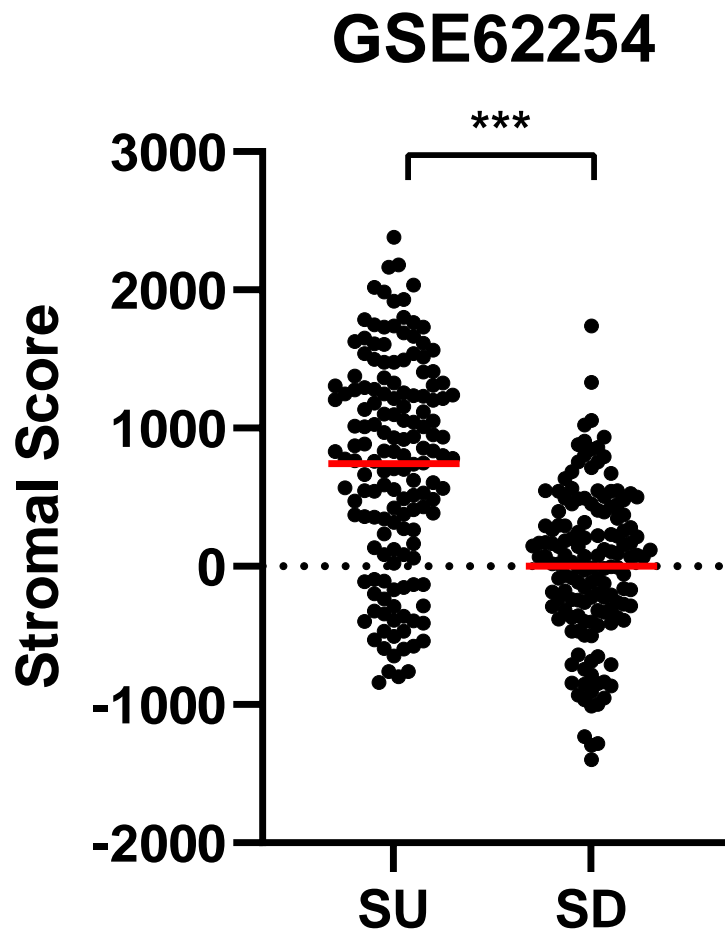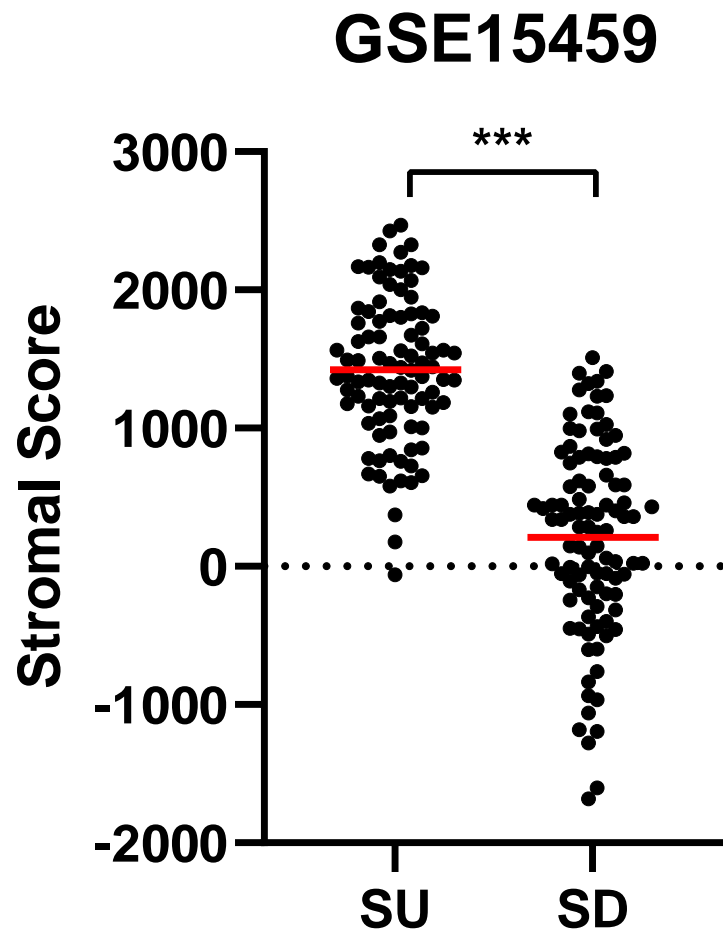

**Supplementary Figure S10:** Stromal scores based on ESTIMATE method for SU and SD samples in GSE62254 and GSE15459. Unpaired t-test p values are shown. \*\*\*  
P < 0.0001
