# Supplementary material for: A Novel Gene List Identifies Tumors with a Stromal-Mesenchymal Phenotype and Worse Prognosis in Gastric Cancer
Source: MDPI journal article supplement (doi:10.3390/cancers15113035), 2023-06-02
Supplement: s1 [file s1]

## GSE62254 (n=282)

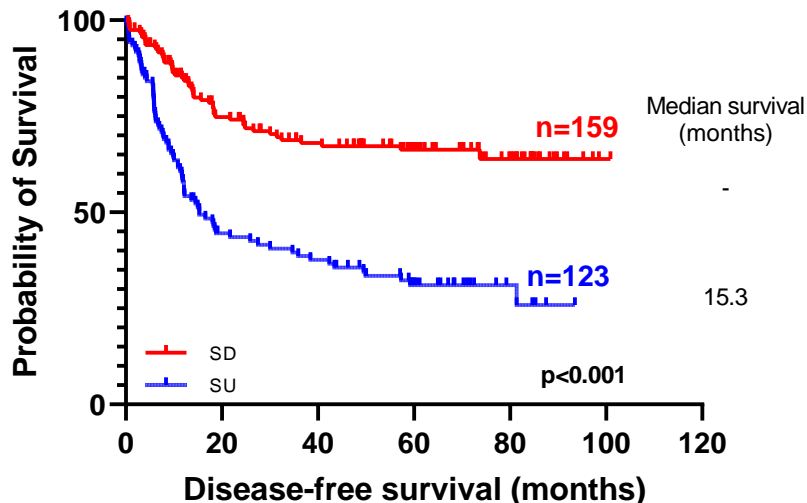

No. at risk:

|     |     |     |    |    |    |   |
|-----|-----|-----|----|----|----|---|
| SD: | 159 | 104 | 86 | 51 | 24 | 2 |
| SU: | 123 | 46  | 39 | 21 | 7  | 1 |

**Supplementary Figure S2:** Prognostic analysis of SU-SD groups using disease-free survival as clinical outcome (GSE62254). Prognostic difference between SU and SD groups were evaluated. Log-rank p value is indicated.
