# Supplementary material for: A Novel Gene List Identifies Tumors with a Stromal-Mesenchymal Phenotype and Worse Prognosis in Gastric Cancer
Source: MDPI journal article supplement (doi:10.3390/cancers15113035), 2023-06-02
Supplement: s1 [file s1]

GSE62254

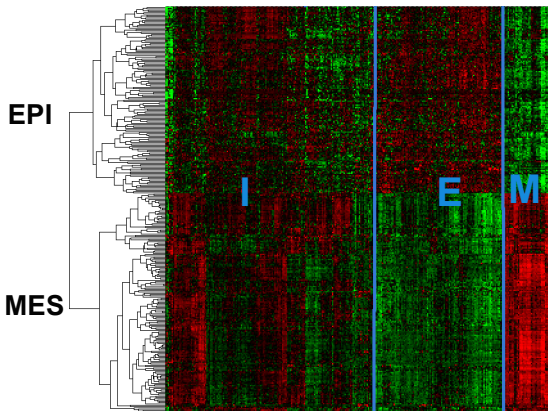

GSE15459

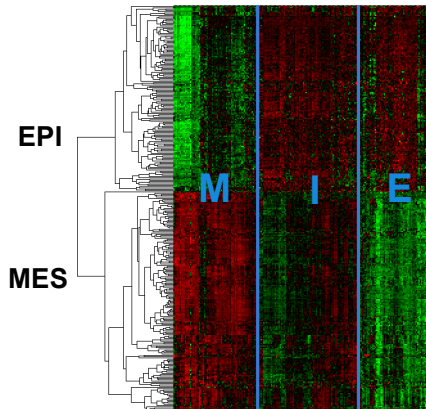

**Supplementary Figure S9:** Hierarchical clustering of gastric tumors based on EMT related gene expression. Rows: Probesets, Columns: Tumors. EPI: Epithelial markers, MES: Mesenchymal markers. Tumors with high epithelial marker and low mesenchymal marker expression were named as E (Epithelial), tumors with the opposite pattern were named as M (Mesenchymal), the rest of the samples were named as I (Intermediate).
