# Supplementary material for: A Novel Gene List Identifies Tumors with a Stromal-Mesenchymal Phenotype and Worse Prognosis in Gastric Cancer
Source: MDPI journal article supplement (doi:10.3390/cancers15113035), 2023-06-02
Supplement: s1 [file s1]

GSE13861 (n=64)

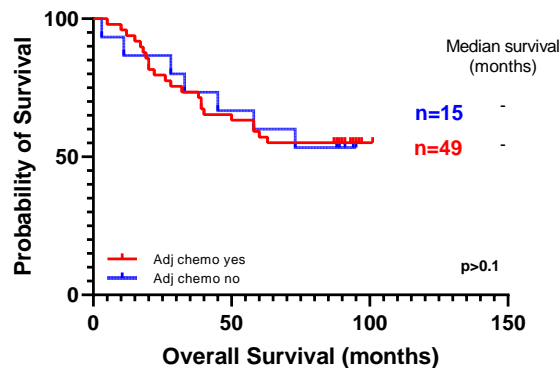

No. at risk:

|                 | 0-50 | 50-100 | 100-150 |
|-----------------|------|--------|---------|
| Adj. chemo yes: | 49   | 32     | 3       |
| Adj. chemo no:  | 15   | 11     | 1       |

|    | no       | yes        |
|----|----------|------------|
| EP | 9 (60 %) | 39 (79.6%) |
| MP | 6 (40 %) | 10 (20.4%) |

GSE26899 (n=93)

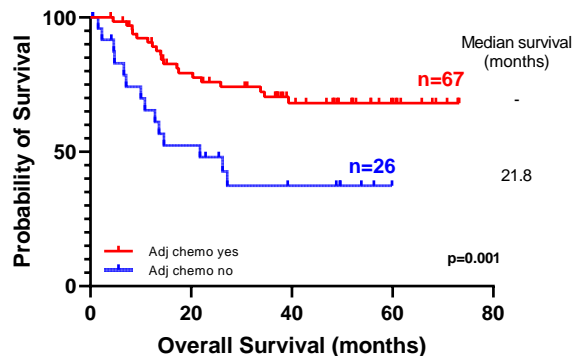

No. at risk:

|                 | 0-20 | 20-40 | 40-60 | 60-80 |
|-----------------|------|-------|-------|-------|
| Adj. chemo yes: | 67   | 48    | 30    | 12    |
| Adj. chemo no:  | 26   | 13    | 7     | 1     |

|    | no          | yes        |
|----|-------------|------------|
| EP | 16 (61.5 %) | 50 (74.6%) |
| MP | 10 (38.5 %) | 17 (25.4%) |

GSE26901 (n=109)

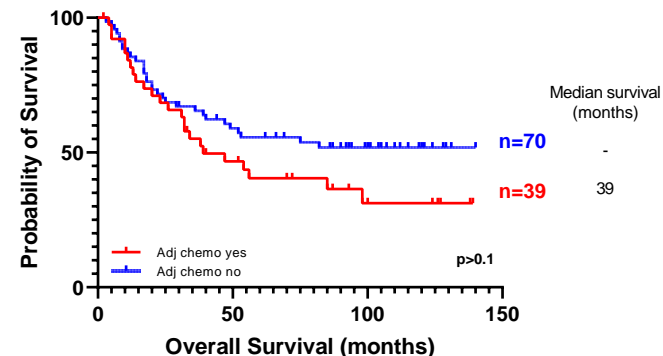

No. at risk:

|                 | 0-50 | 50-100 | 100-150 |
|-----------------|------|--------|---------|
| Adj. chemo yes: | 39   | 17     | 6       |
| Adj. chemo no:  | 70   | 36     | 16      |

|    | no          | yes        |
|----|-------------|------------|
| EP | 48 (68.6 %) | 22 (56.4%) |
| MP | 22 (31.4 %) | 17 (43.6%) |

**Supplementary Figure S4:** Kaplan Meier graphs comparing patients who received and who did not receive adjuvant chemotherapy. Distribution of tumors with epithelial (EP) and mesenchymal profiles (MP) obtained from Oh et al [29] is shown across treatment information in GSE13861, GSE26899 and GSE26901.
