# Supplementary material for: A Novel Gene List Identifies Tumors with a Stromal-Mesenchymal Phenotype and Worse Prognosis in Gastric Cancer
Source: MDPI journal article supplement (doi:10.3390/cancers15113035), 2023-06-02
Supplement: s1 [file s1]

a

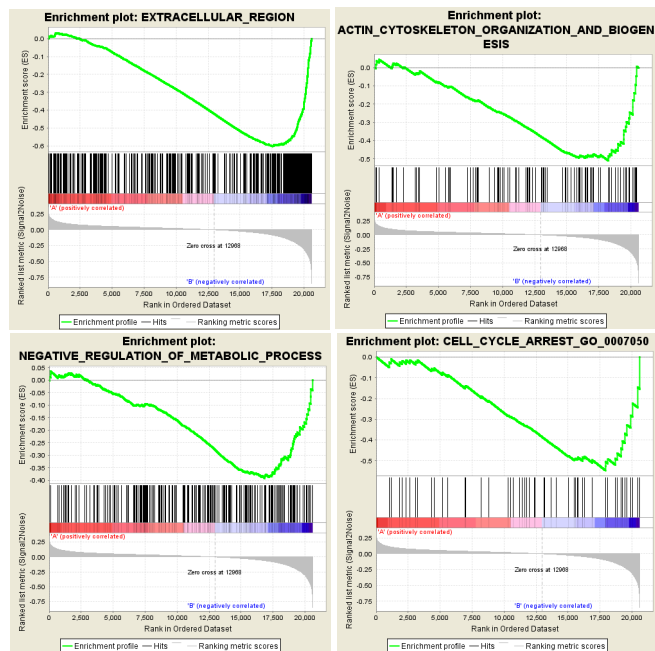

b

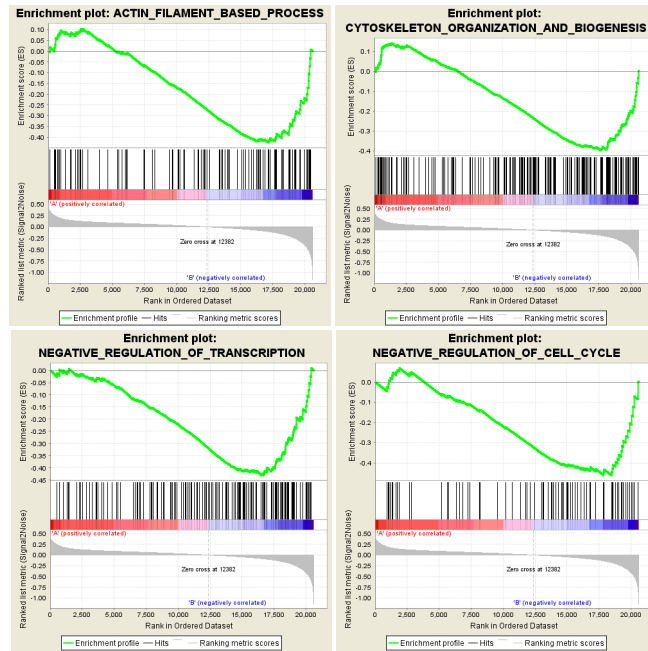

**Supplementary Figure S8:** Enrichment plots of highly enriched gene sets listed in Supplementary Table S6 for (a) GSE62254 and (b) GSE15459. Genesets related to the extracellular matrix, cytoskeleton and a reduction of metabolic processes and cell growth were noted. The groups in the enrichment plot are A: SD, B: SU.
