# Supplementary material for: A Novel Gene List Identifies Tumors with a Stromal-Mesenchymal Phenotype and Worse Prognosis in Gastric Cancer
Source: Cancers (Basel). 2023 Jun 2;15(11):3035. doi: 10.3390/cancers15113035 (PMC10252086; doi:10.3390/cancers15113035)
Supplement: Supplementary file 1 [file cancers-15-03035-s001.zip]

Archive with 19 entries (19 files):
- Supp Figure S1.pdf
- Supp Figure S10.pdf
- Supp Figure S11.pdf
- Supp Figure S12.pdf
- Supp Figure S13.pdf
- Supp Figure S14.pdf
- Supp Figure S15.pdf
- Supp Figure S16.pdf
- Supp Figure S2.pdf
- Supp Figure S3.pdf
- Supp Figure S4.pdf
- Supp Figure S5.pdf
- Supp Figure S6.pdf
- Supp Figure S7.pdf
- Supp Figure S8.pdf
- Supp Figure S9.pdf
- Supp. Figure S17.pdf
- Supp. Figure S18.pdf
- Supplementary Tables.pdf
